# Supplementary material for: Icosahedral gold–platinum alloy nanocrystals in hollow silica: a highly active and stable catalyst for Ullmann reactions
Source: Royal Society of Chemistry journal article supplement (doi:10.1039/c3cc46383d), 2013-11-01

## Electronic Supplementary Information

### Icosahedral Gold-Platinum Alloy Nanocrystals in Hollow Silica: A High Active and Stable Catalyst for Ullmann Reaction

**Xiaoli Wu,<sup>a,c</sup> Longfei Tan,\*<sup>a</sup> Dong Chen,<sup>b</sup> Xianwei Meng<sup>a</sup> and Fangqiong Tang\*<sup>a</sup>**

<sup>a</sup>Laboratory of Controllable Preparation and Application of Nanomaterials, Technical Institute of Physics and Chemistry, Chinese Academy of Sciences, Beijing 100190, P. R. China

<sup>b</sup> Beijing Creative Nanophase Hi-Tech Company, Limited, Beijing 100086, P. R. China

<sup>c</sup> University of Chinese Academy of Sciences, Beijing 100049, P. R. China

E-mail: tangfq@mail.ipc.ac.cn; longfeitan@mail.ipc.ac.cn

## Experimental Section

**Chemicals and Reagents.** Tetraethoxysilane (TEOS), hydrofluoric acid (HF), potassium carbonate ( $K_2CO_3$ ), ammonia solution ( $NH_3 \cdot H_2O$ ), ethanol ( $C_2H_5OH$ ), sodium formate ( $HCO_2Na$ ) and poly (N-vinyl-2-pyrrolidone) (PVP,  $M_w=55,000$ ) were obtained from Sinopharm Chemical Reagent Beijing Co., Ltd. N-[3-(trimethoxysilyl) propyl] ethylenediamine (TSD) was purchased from Fluka. Hydrogen tetrachloroaurate trihydrate ( $HAuCl_4 \cdot 3H_2O$ ), Chloroplatinic acid ( $H_2PtCl_6$ ), iodobenzene and pentamethylbenzene were purchased from Sigma-Aldrich. Pd/C (5% Pd loading) catalyst was purchased from Alfa Aesar. Pt/C (10% Pt loading) catalyst was purchased from Fluorochem. Deionized water was used for all experiments.

**Preparation of Hybrid Silica Nanospheres.** The hybrid silica nanospheres with an etchable and reductive middle layer structure were fabricated via a modified Stöber method according to our previous work.<sup>[1]</sup> In a typical reaction, solution A (2 mL TEOS in 18 mL ethanol), solution B (20 mL 28 % aqueous  $NH_3$  and 60 mL ethanol) and solution C (250  $\mu$ L TSD in 10 mL ethanol) were prepared. 3 mL of solution A was added into solution B and reacted for 10 min under vigorously stirring. Then, solution C and 10 mL of solution A were added into the reaction mixture. Lastly, remaining solution A was added. The reaction was kept for 3 h at 30 °C. The hybrid silica nanospheres were isolated by centrifugation and washed with ethanol and water repeatedly.

**Synthesis of Icosahedral Au-Pt@SiO<sub>2</sub>.** The icosahedral Au-Pt@SiO<sub>2</sub> was prepared via a simultaneous etching and growth strategy. 30 mg of hybrid silica nanospheres were mixed into 10 mL of deionized water, and then 200 μL of HAuCl<sub>4</sub> (50 mM) and a bit of H<sub>2</sub>PtCl<sub>6</sub> solution (15 μL, 50 mM) were added. After adjusting the pH value to 3.0 with HCl, the mixture was stirred for 1 h at room temperature then heated at 200°C for 3 h. After that the autoclave was cooled naturally to room temperature. The as-synthesized nanoparticles were collected, washed and dried. Then the icosahedral Au-Pt@SiO<sub>2</sub> with Au loading of 10.1% (wt %) was obtained, which was measured by inductively coupled plasma-atomic emission spectrometry (ICP-AES).

**Synthesis of Spherical Au@SiO<sub>2</sub>.** The synthetic procedure is similar to the preparation of icosahedral Au-Pt@SiO<sub>2</sub> without adding H<sub>2</sub>PtCl<sub>6</sub> solution. 30 mg of hybrid silica nanospheres were mixed into 10 mL of deionized water, and then 200 μL of HAuCl<sub>4</sub> (50 mM) was added. The mixture (pH 3.0) was stirred for 1 h at room temperature then heated at 140°C for 4 h. Then the spherical Au@SiO<sub>2</sub> with Au loading of 10.4% (wt %) was obtained.

**General Protocol for Ullmann Homocoupling Reaction.** 5 mg of catalyst, 1 mmol of K<sub>2</sub>CO<sub>3</sub>, 0.5 mmol of iodobenzene, and 0.5 mmol of pentamethylbenzene (as internal standard for HPLC analysis) were added to 10 mL of mixture of ethanol and water (v/v=4/1). The reaction was taken at 80 °C under stirring. A certain amount of the reaction mixture was collected at special time during reaction. The mixture was

separated quickly by centrifugation, and the liquid was analyzed by high performance liquid chromatography (HPLC).

**Material characterization.** Transmission electron microscopy (TEM) and high-resolution transmission electron microscopy (HRTEM) were performed on a JEOL JEM 2010F electron microscope operating at 200 kV. X-ray Powder diffraction patterns were accumulated on a Japan Regaku D/max  $\gamma$ A X-ray diffractometer using graphite monochromatized Cu K radiation ( $\lambda=1.5418 \text{ \AA}$ ). The backscattered scanning electron microscopy (SEM) and the energy-dispersive X-ray (EDS) spectroscopic measurements were performed with a Hitachi S-4800 scanning electron field emission microscopy. The high-angle annular dark-field scanning TEM (HAADF-STEM) image and STEM-EDS scan were performed using a Tecnai G2 F20 U-TWIN transmission electron microscope. Nitrogen adsorption-desorption measurements were carried out on a Quadra-Sorb SI automated surface area and pore-size analyser by using the volumetric method.

## References.

1. D. Chen, L. Li, F. Tang and S. Qi, *Adv. Mater.*, 2009, **21**, 3804.

**Figure S1.** SEM image of 1h Au-Pt@SiO<sub>2</sub>.

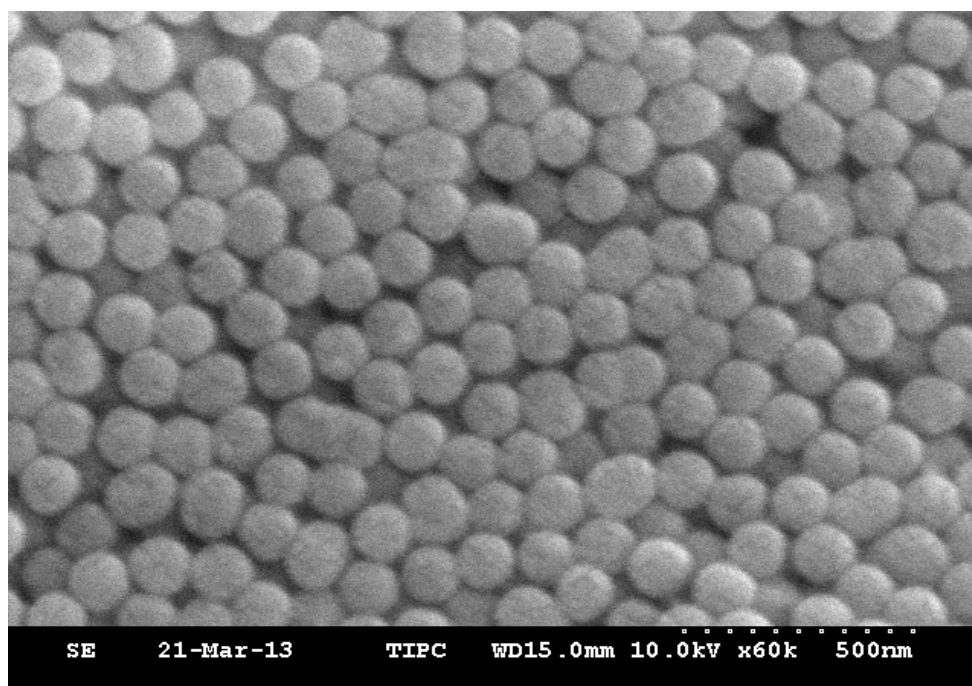

**Figure S2.** The nitrogen adsorption-desorption isotherm of 1h Au-Pt@SiO<sub>2</sub>.

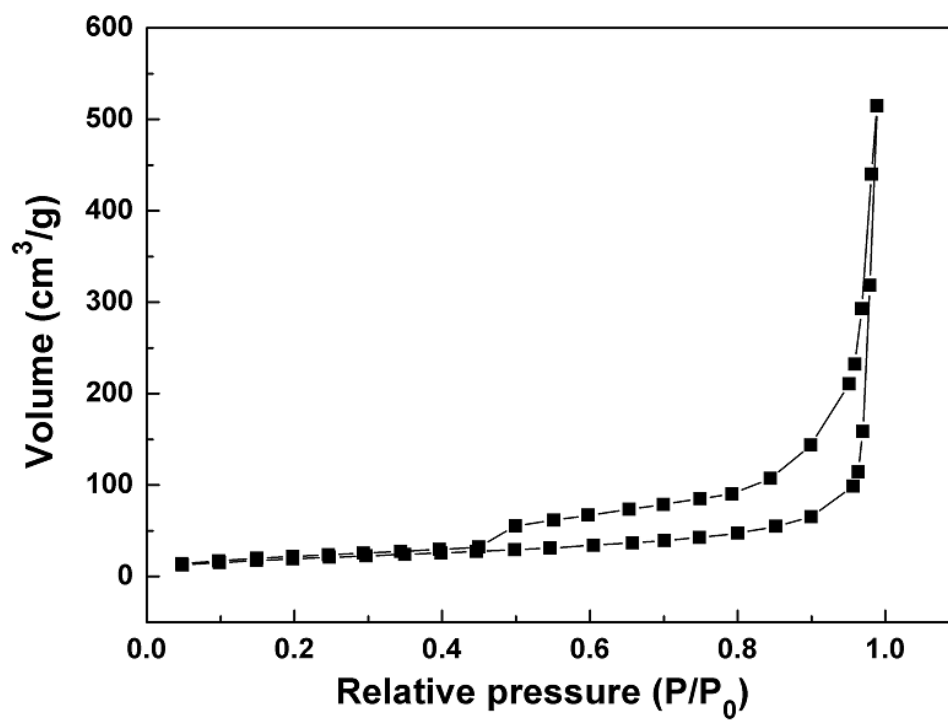

**Figure S3.** The UV-vis spectra of Sr Au@SiO<sub>2</sub> and Ih Au-Pt@SiO<sub>2</sub>. The peak of Sr Au@SiO<sub>2</sub> and Ih Au-Pt@SiO<sub>2</sub> is 524nm and 519nm, respectively.

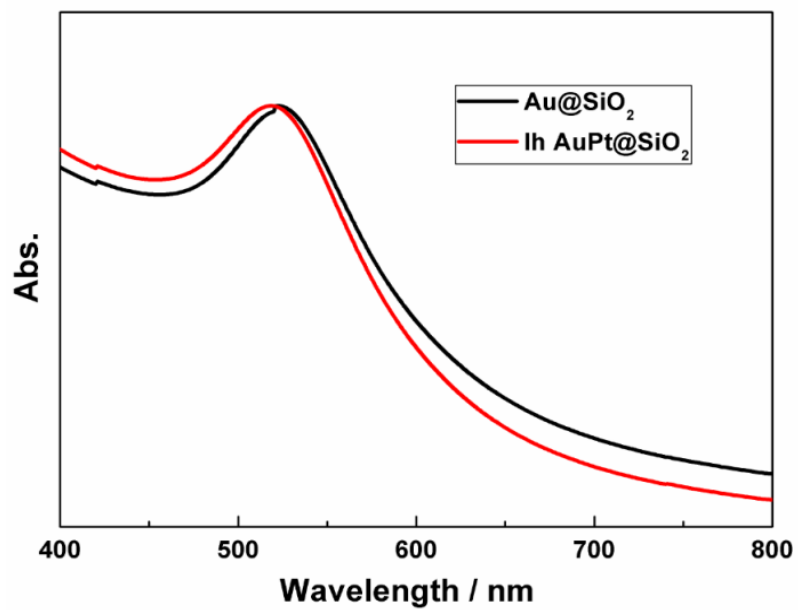

**Figure S4.** Wide-angle XRD pattern of Ih Au-Pt@SiO<sub>2</sub>.

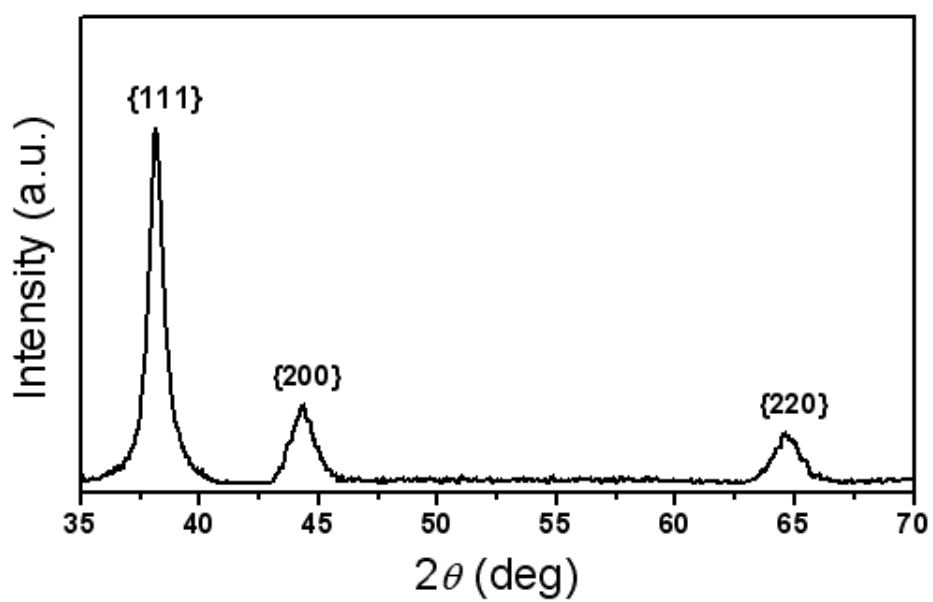

**Figure S5.** SEM-EDX spectrum of Ih Au-Pt@SiO<sub>2</sub>.

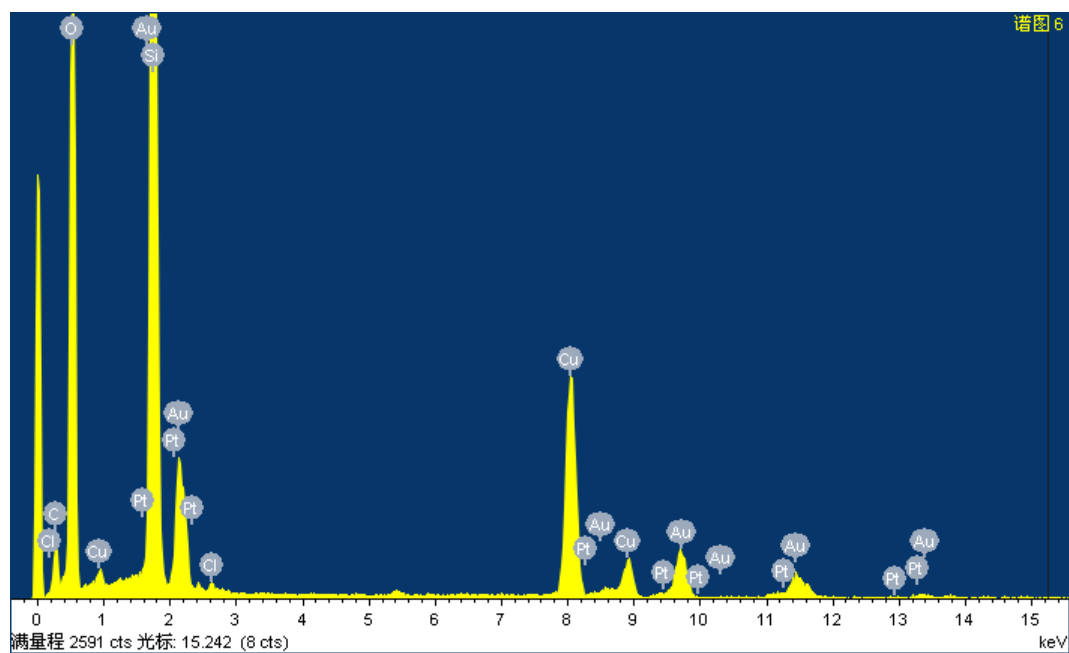

**Figure S6.** The illustration of Ullmann reaction catalyzed by Ih Au-Pt@SiO<sub>2</sub>.

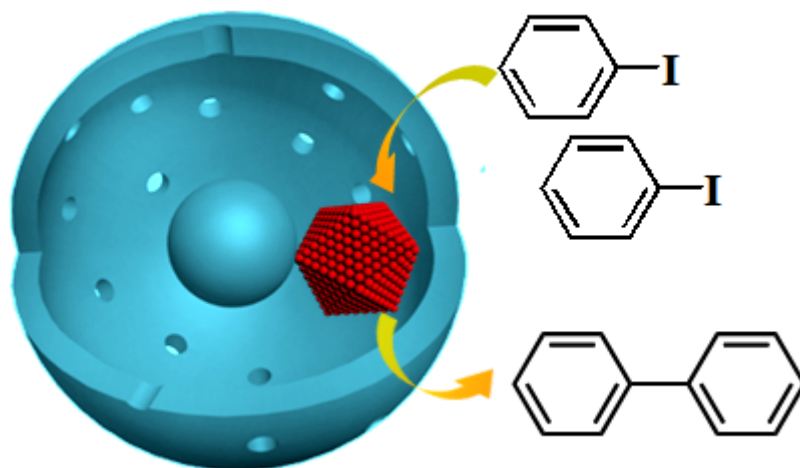

**Figure S7.** TEM image of  $\text{Ih Au-Pt@SiO}_2$  after calcination in air at  $500^\circ\text{C}$  for 1 hour.

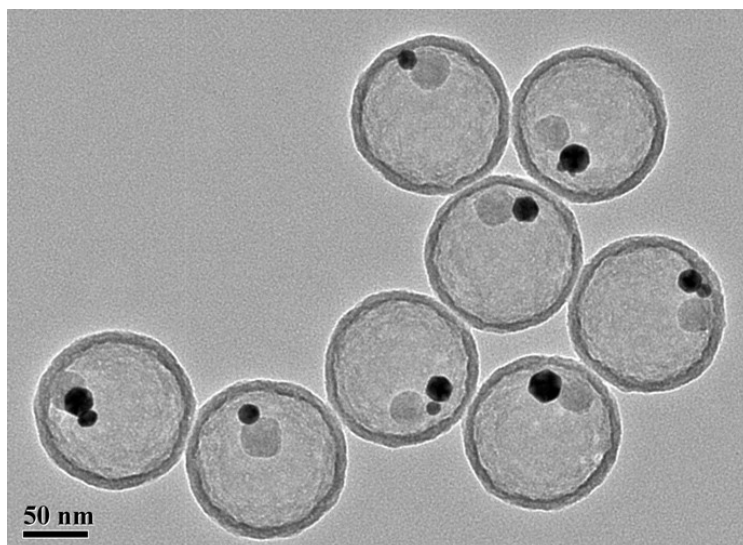

**Figure S8.** TEM image of  $\text{Sr Au@SiO}_2$  after calcination in air at  $500^\circ\text{C}$  for 1 hour.

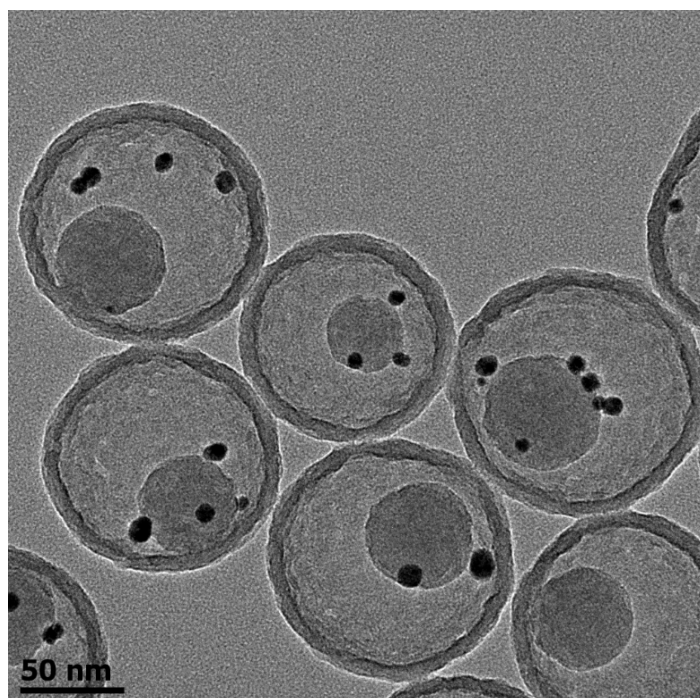



**Figure S9.** Yields of biphenyl versus the recycle number using Ih Au-Pt@SiO<sub>2</sub> nanoparticles and unsupported Ih Au-Pt nanoparticles as catalysts.

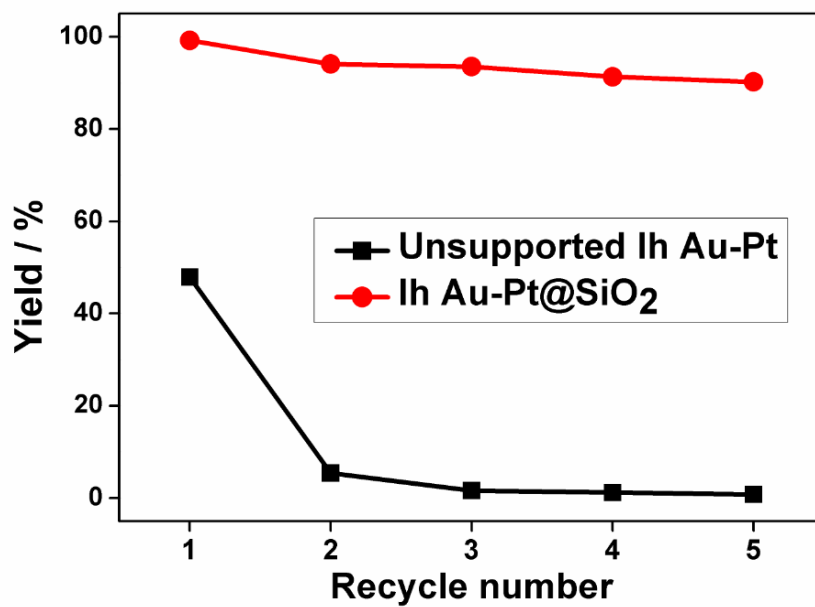

Supplement: c3cc46383d.pdf [file c3cc46383d.pdf]
